# Supplementary material
Source: Springer Nature journal article supplement (https://www.springermedizin.de/resource/supplementary/12885_2008_1290_MOESM6_ESM.pdf/9471662)

**A****Control****CT-322****H&E**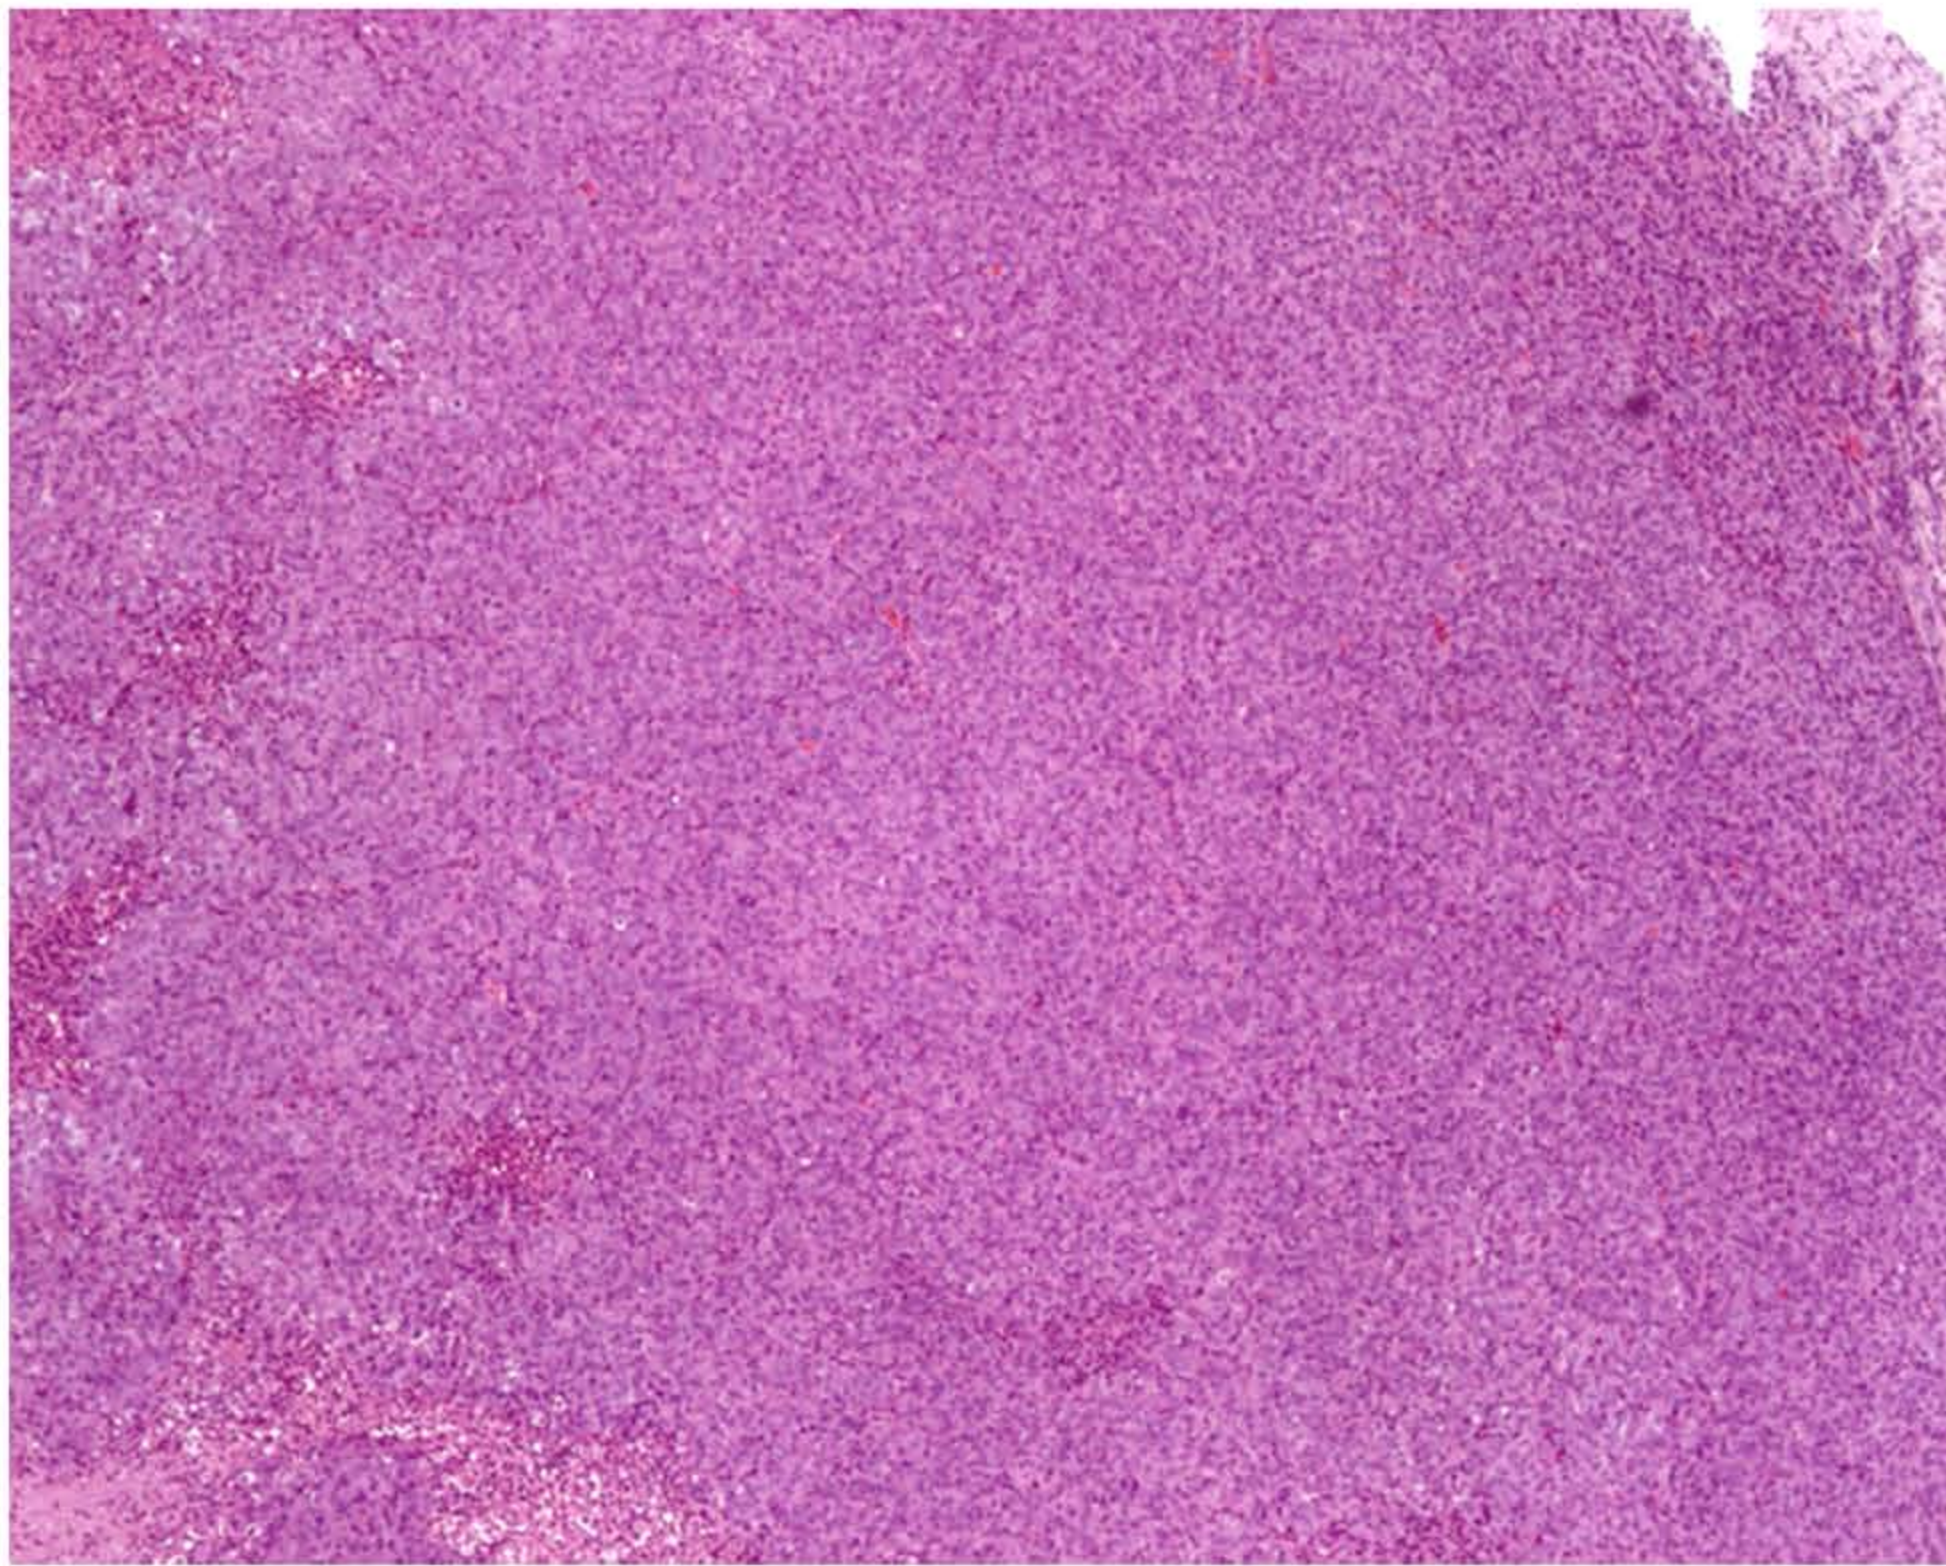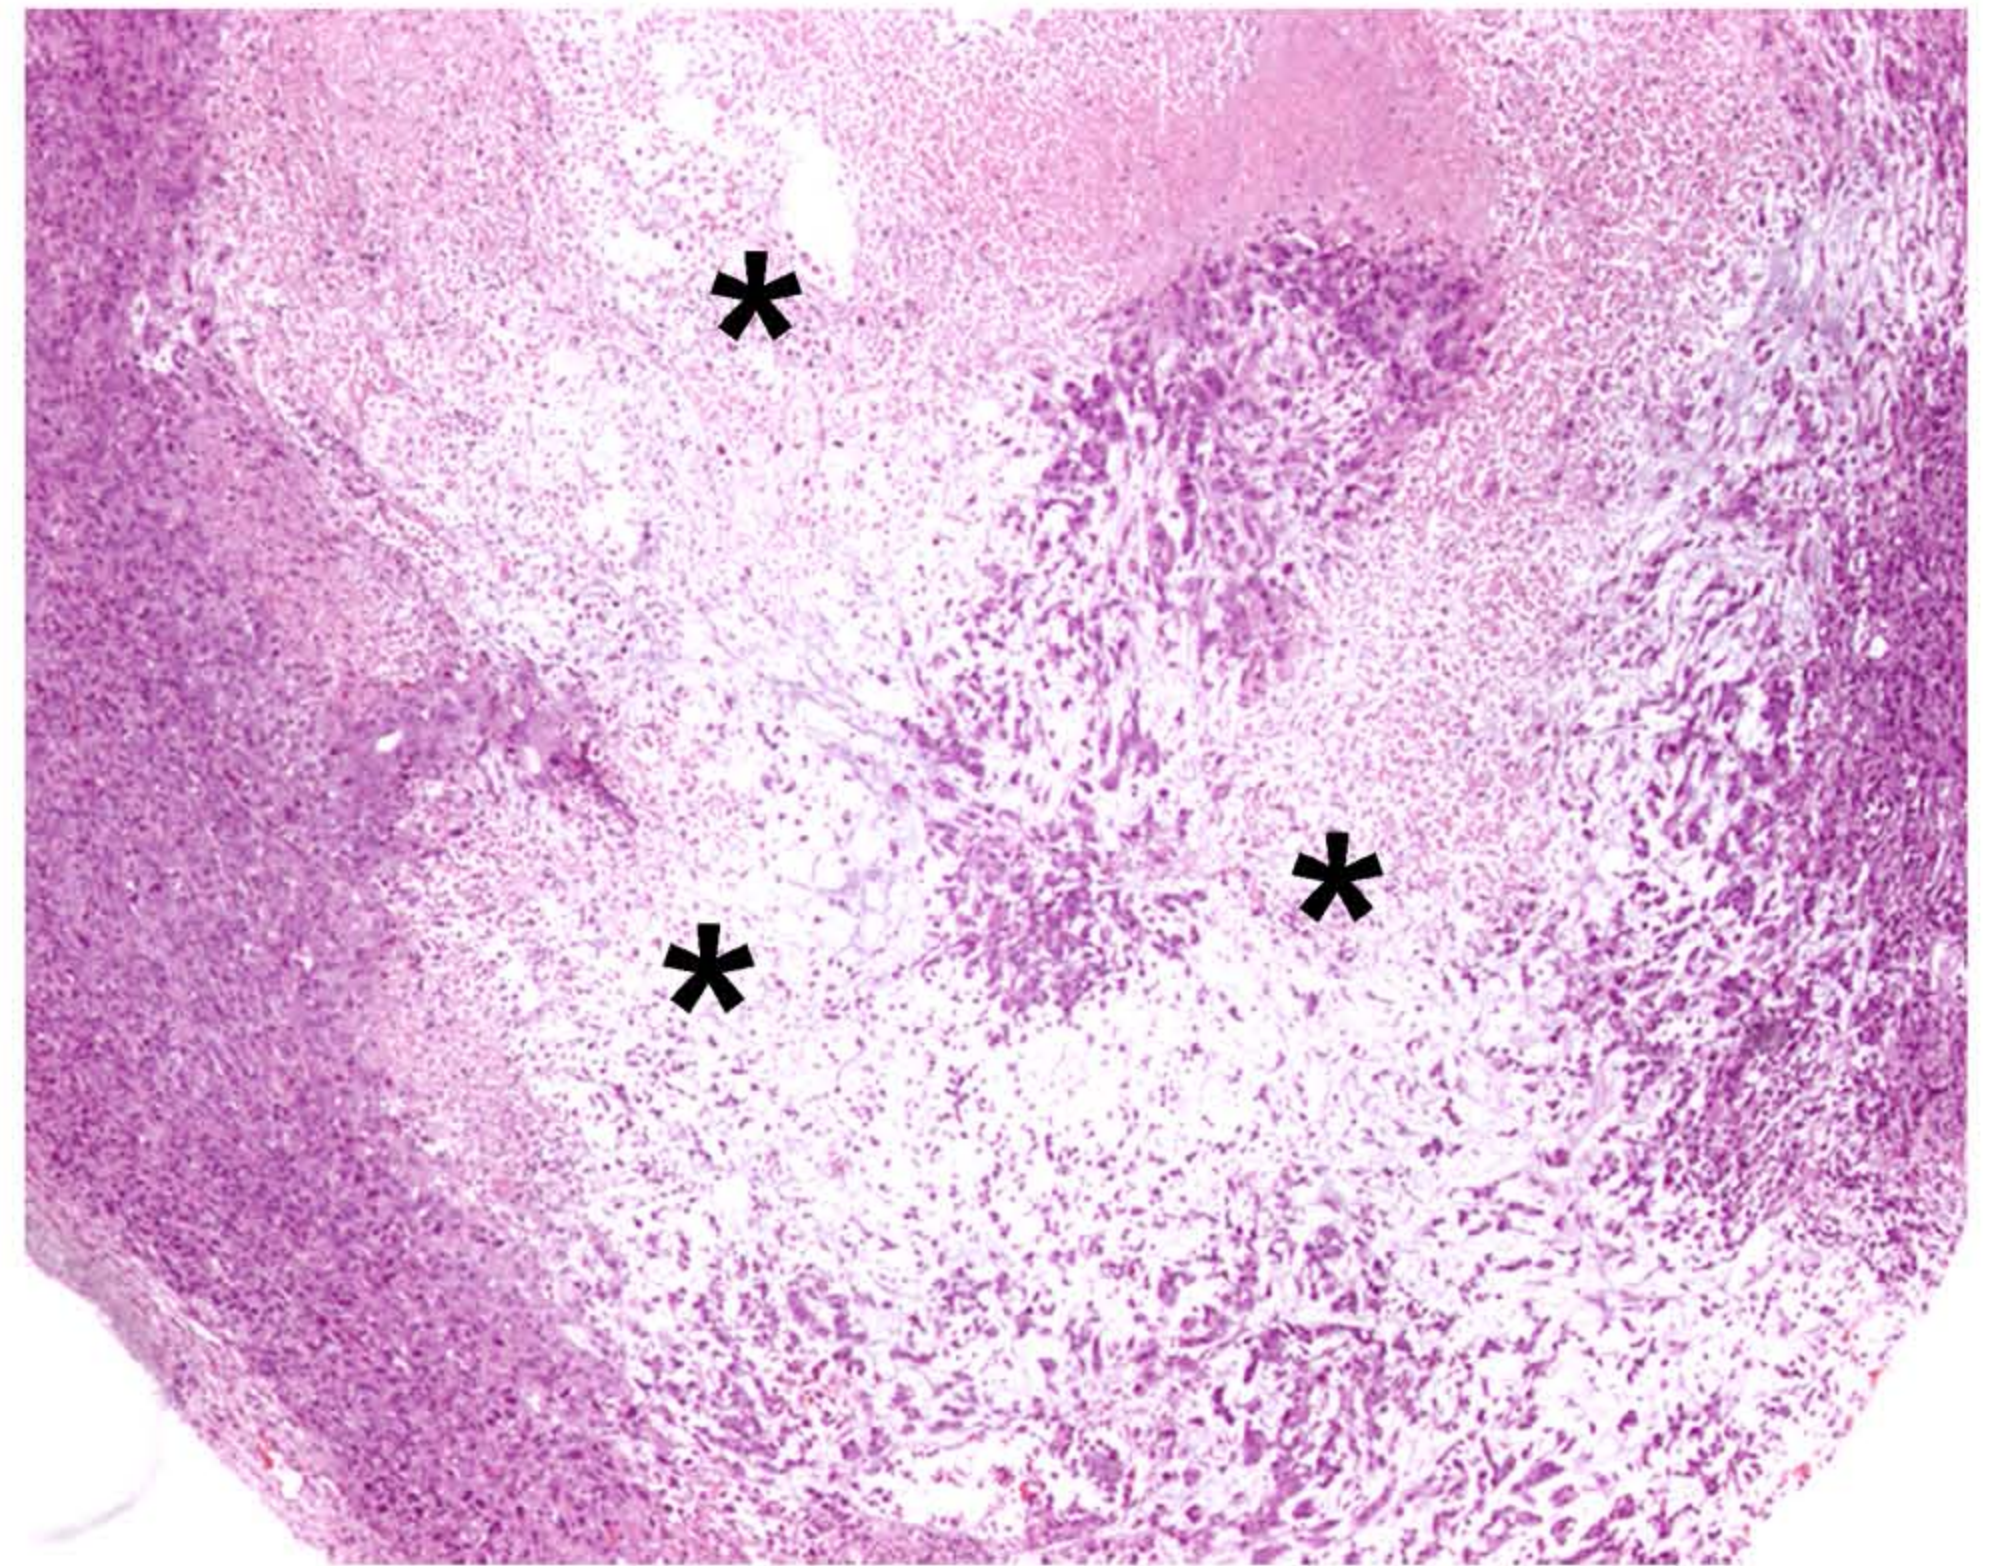**B****Control****CT-322****TUNEL**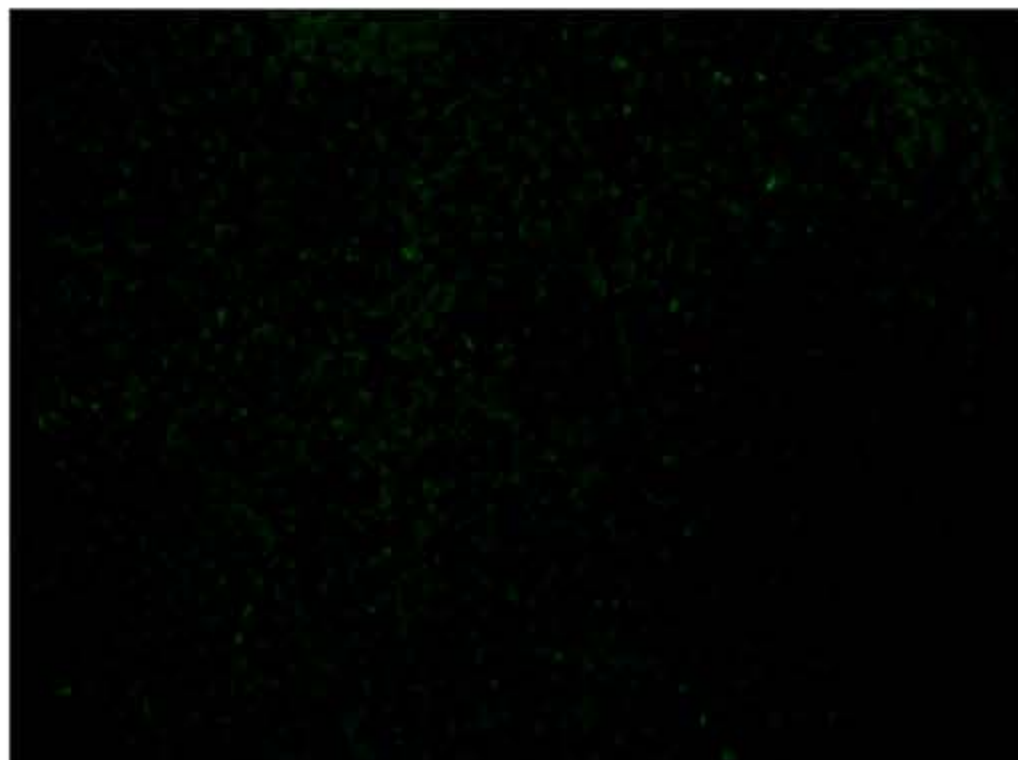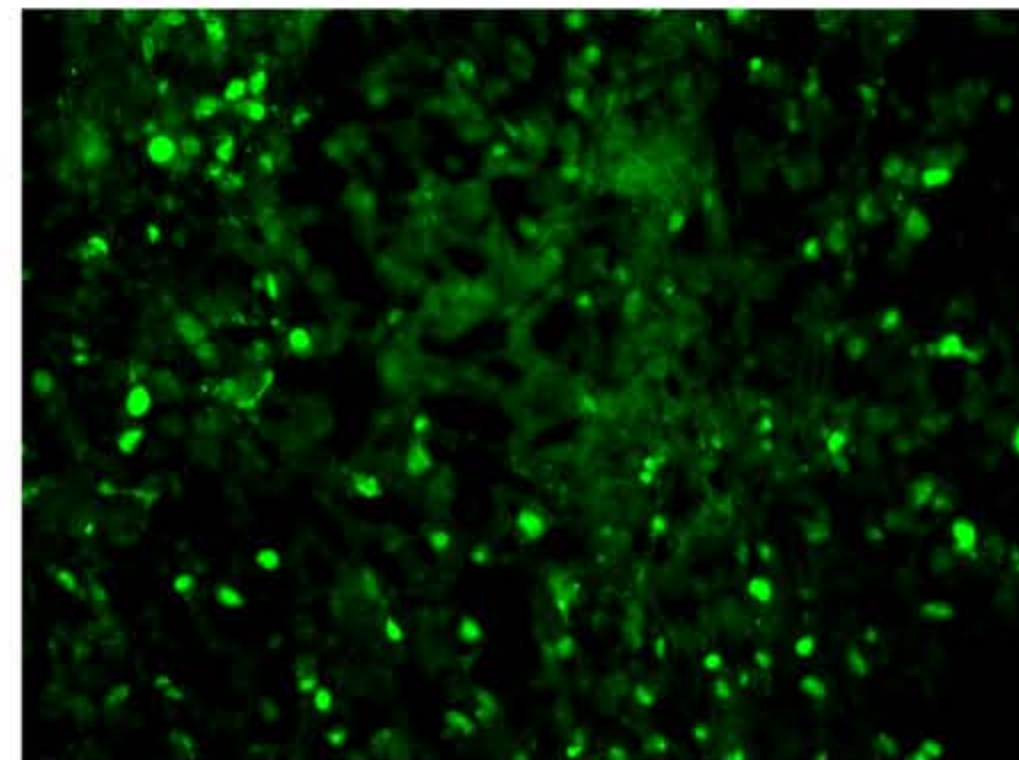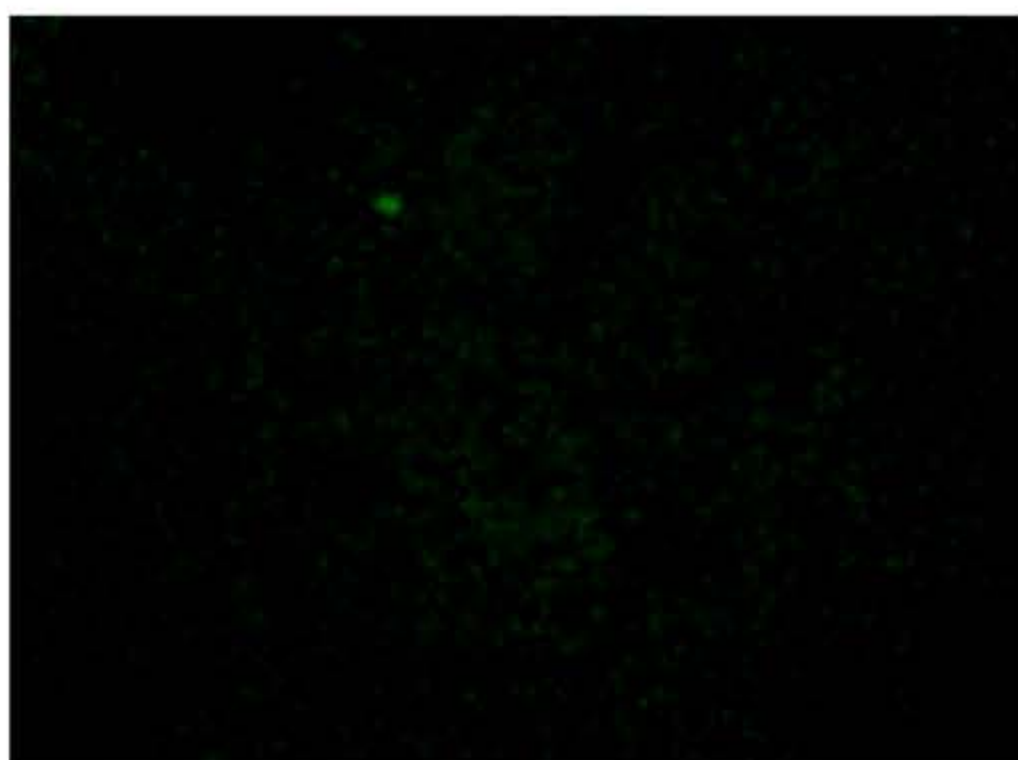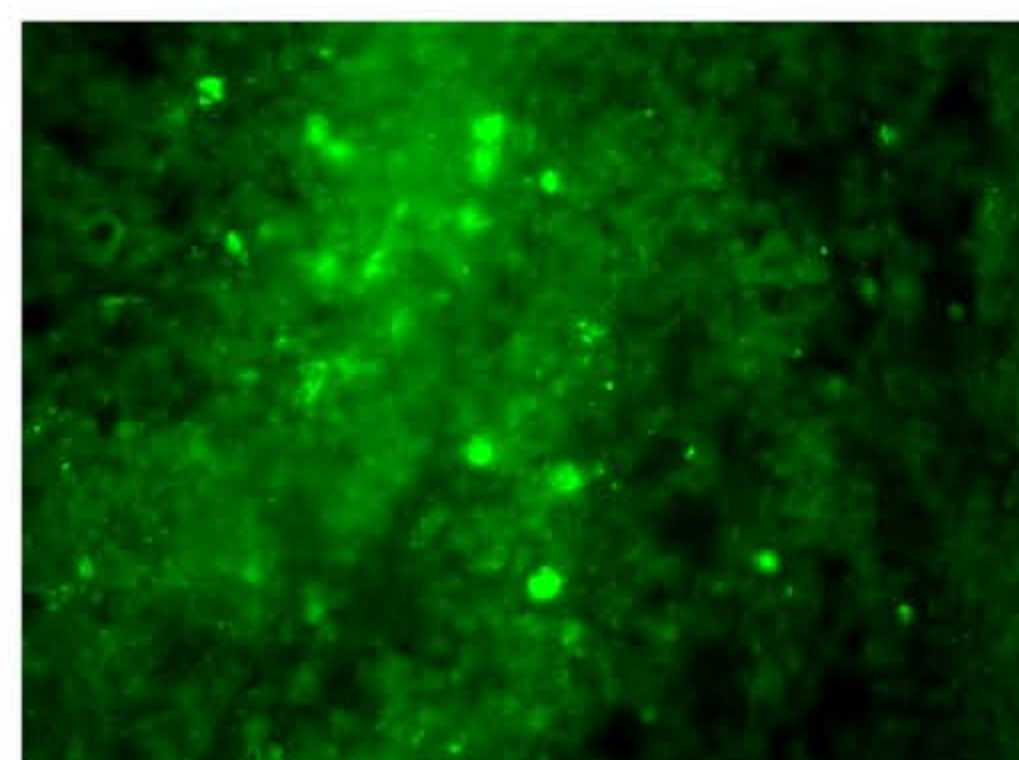**% Above Threshold**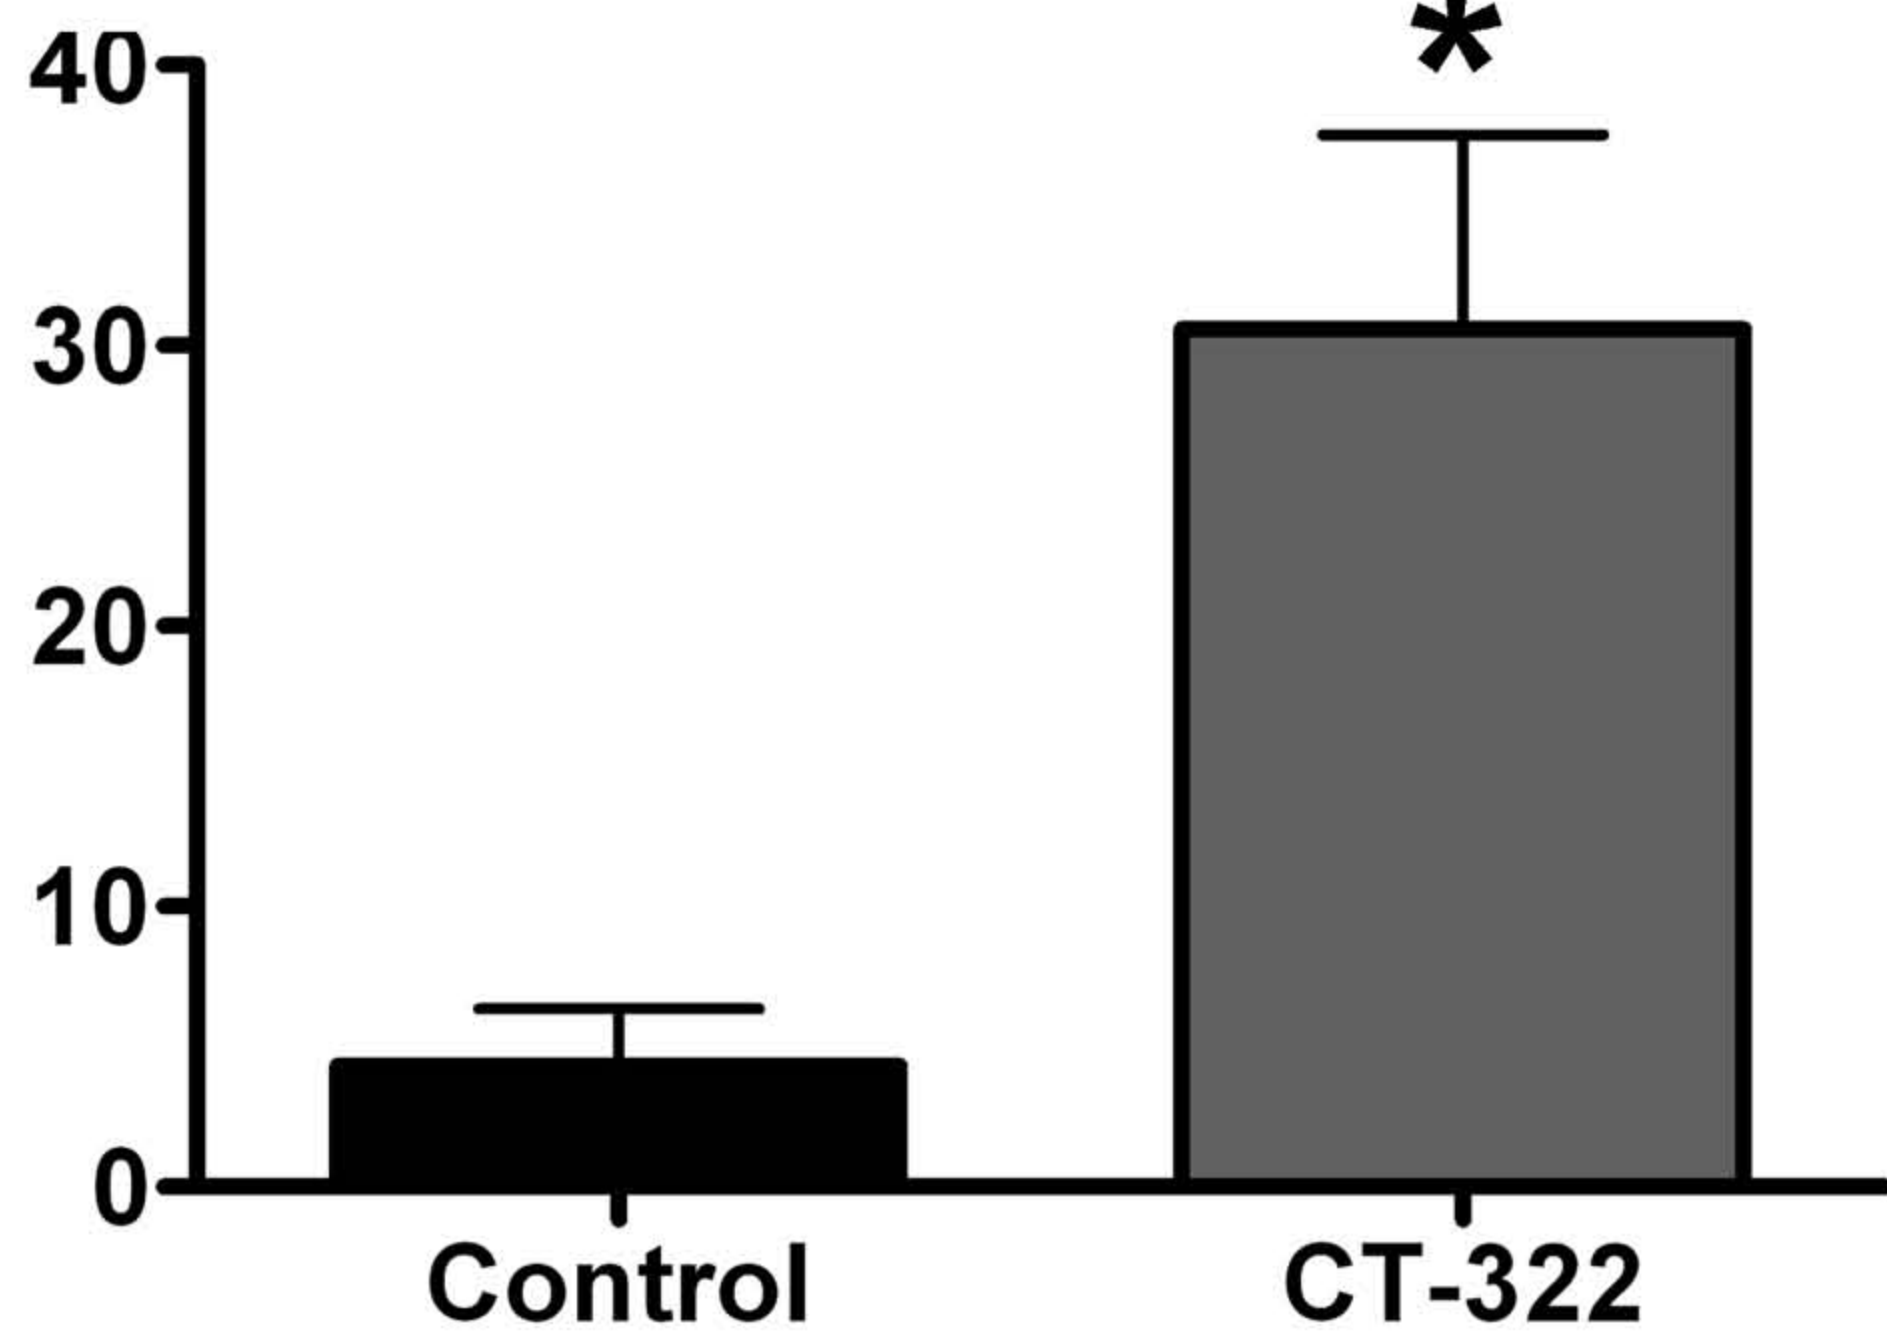

Supplement: MOESM6 [file 9471662]
